# Supplementary material for: Risk of atrial fibrillation and stroke among older men exposed to prolonged endurance sport practice: a 10-year follow-up. The Birkebeiner Ageing Study and the Tromsø Study
Source: PubMed Central journal article supplement — Open Heart. 2022 Nov 17;9(2):e002154. doi: 10.1136/openhrt-2022-002154 (PMC9677011; doi:10.1136/openhrt-2022-002154), 2022-11-17
Supplement: openhrt-2022-002154supp001.pdf [file openhrt-2022-002154supp001.pdf]

Johansen et al. Risk of atrial fibrillation and stroke among older men exposed to prolonged endurance sport practice – a 10-year follow-up. The Birkebeiner Ageing Study and the Tromsø Study

## SUPPLEMENTARY MATERIAL

**Table S1.**

Baseline characteristics of participants from the Birkebeiner Ageing Study (athletes) according to those who attended follow-up in 2020 and those who did not.

| Baseline characteristics                               | Attended follow-up<br>(n=353) | Did not attend<br>follow-up in 2020<br>(n=152) | p-value |
|--------------------------------------------------------|-------------------------------|------------------------------------------------|---------|
| Age                                                    | 67 (65 – 71)                  | 69 (66 – 73)                                   | <0.001  |
| Height (cm)                                            | 178 (175 – 182)               | 177 (173 – 182)                                | 0.06    |
| Weight (kg)                                            | 75 (70 – 80)                  | 75 (69 – 80)                                   | 0.64    |
| BMI (kg·m <sup>-2</sup> )                              | 23.4 (22.2 – 24.7)            | 23.7 (22.5 – 24.9)                             | 0.38    |
|                                                        | <b>% (n)</b>                  | <b>% (n)</b>                                   |         |
| Education                                              |                               |                                                | <0.01   |
| Primary/Secondary school                               | 12.3 (43)                     | 26.7 (40)                                      |         |
| High School                                            | 43.4 (152)                    | 39.3 (59)                                      |         |
| College/University                                     | 44.3 (155)                    | 34.0 (51)                                      |         |
| Smoking status                                         |                               |                                                | 0.15    |
| Current                                                | 0.6 (2)                       | 1.3 (2)                                        |         |
| Former                                                 | 35.5 (125)                    | 43.4 (66)                                      |         |
| Never                                                  | 63.9 (225)                    | 55.3 (84)                                      |         |
| Frequency of alcohol consumption                       |                               |                                                | 0.34    |
| Never                                                  | 9.1 (31)                      | 10.3 (15)                                      |         |
| 1-4 times per month                                    | 74.3 (254)                    | 69.9 (102)                                     |         |
| 2-3 times a week                                       | 13.2 (45)                     | 17.8 (26)                                      |         |
| 4 times or more per week                               | 3.5 (12)                      | 2.1 (3)                                        |         |
| Coronary heart disease                                 | 3.4 (12)                      | 4.0 (6)                                        | 0.75    |
| Previous stroke                                        | 2.0 (7)                       | 0.7 (1)                                        | 0.27    |
| Atrial fibrillation                                    | 14.2 (50)                     | 12.7 (19)                                      | 0.65    |
| Diabetes                                               | 0.6 (2)                       | 1.3 (2)                                        | 0.38    |
| Currently or previously on antihypertensive medication | 14.0 (47)                     | 19.9 (29)                                      | 0.10    |
| Self-reported physical activity                        |                               |                                                | 0.20    |
| Sedentary                                              | 0.3 (1)                       | 0.0 (0)                                        |         |
| Light                                                  | 8.1 (28)                      | 13.8 (20)                                      |         |
| Moderate                                               | 51.0 (177)                    | 51.0 (74)                                      |         |
| Vigorous                                               | 40.6 (141)                    | 35.2 (51)                                      |         |

Values are presented as median (25<sup>th</sup> and 75<sup>th</sup> percentile) for continuous variables and as percentages for categorical variables.

**Table S2.**

Baseline characteristics in the Tromsø Study (Tromsø6) (non-athletes) according to those who attended follow-up and those who did not.

| Baseline characteristics                               | Attended follow-up<br>(n = 1033) | Did not attend follow-up<br>(n = 834) | p-value |
|--------------------------------------------------------|----------------------------------|---------------------------------------|---------|
| Age                                                    | 69 (66 – 73)                     | 73 (68 – 78)                          | <0.01   |
| Height (cm)                                            | 175 (170.6 – 179.2)              | 174.1 (169.6 – 178.3)                 | <0.01   |
| Weight (kg)                                            | 81.9 (74.4 – 90.7)               | 79.9 (71.9 – 89.0)                    | <0.01   |
| BMI (kg·m <sup>-2</sup> )                              | 26.9 (24.6 – 29.2)               | 26.5 (24.2 – 29.2)                    |         |
|                                                        | % (n)                            | % (n)                                 |         |
| Education                                              |                                  |                                       | <0.01   |
| Primary/Secondary school                               | 27.8 (280)                       | 45.5 (366)                            |         |
| High School                                            | 38.6 (389)                       | 32.3 (260)                            |         |
| College/University                                     | 33.6 (339)                       | 22.2 (179)                            |         |
| Smoking status                                         |                                  |                                       | <0.01   |
| Current                                                | 11.9 (121)                       | 20.0 (160)                            |         |
| Former                                                 | 60.7 (618)                       | 60.6 (485)                            |         |
| Never                                                  | 27.5 (280)                       | 19.5 (156)                            |         |
| Frequency of alcohol consumption                       |                                  |                                       | <0.01   |
| Never                                                  | 10.4 (106)                       | 18.9 (153)                            |         |
| 1-4 times per month                                    | 65.9 (670)                       | 61.8 (499)                            |         |
| 2-3 times a week                                       | 16.5 (168)                       | 14.4 (116)                            |         |
| 4 times or more per week                               | 7.2 (73)                         | 5.0 (40)                              |         |
| Coronary heart disease                                 | 18.7 (190)                       | 31.3 (254)                            | <0.01   |
| Previous stroke                                        | 5.3 (53)                         | 9.2 (73)                              | <0.01   |
| Atrial fibrillation                                    | 9.7 (96)                         | 15.6 (15.6)                           | <0.01   |
| Diabetes                                               | 6.1 (62)                         | 11.5 (92)                             | <0.01   |
| Currently or previously on antihypertensive medication | 35.4 (356)                       | 46.8 (373)                            | <0.01   |
| Self-reported physical activity                        |                                  |                                       | <0.01   |
| Sedentary                                              | 14.6 (136)                       | 25.8 (178)                            |         |
| Light                                                  | 57.9 (540)                       | 58.2 (401)                            |         |
| Moderate                                               | 26.6 (248)                       | 15.5 (107)                            |         |
| Vigorous                                               | 1.0 (9)                          | 0.4 (3)                               |         |

Values are presented as median (25<sup>th</sup> and 75<sup>th</sup> percentile) for continuous variables and as percentages for categorical variables.

**Figure S1.**

Simplified directed acyclic graph depicting the total effect model (model 2). Green node with “►” illustrates exposures. Blue node with “I” illustrates outcomes. White nodes illustrate covariates that have been conditioned on. Blue nodes indicate descendant of the exposure and ancestor of the outcome. Black arcs depict blocked pathways, green arcs indicate causal pathways. BMI: Body mass index, CHD: Coronary heart disease.

**Figure S2.**

Simplified directed acyclic graph depicting the direct effect model (model 3). Green node with “►” illustrates exposures. Blue node with “I” illustrates outcomes. White nodes illustrate covariates that have been conditioned on. Black arcs depict blocked pathways, green arcs indicate causal pathways. BMI: Body mass index, CHD: Coronary heart disease.

**Figure S3.**

Simplified directed acyclic graph depicting body mass index, blood pressure, diabetes and coronary heart disease as potential sources of confounding bias in model 2. Green node with “►” illustrates exposures. Blue node with “I” illustrates outcomes. White nodes illustrate covariates that have been conditioned on. Red nodes indicate ancestor of exposure and outcome variables. Red arcs depict biasing pathways, black arcs depict blocked pathways, green arcs indicate causal pathways. BMI: Body mass index, CHD: Coronary heart disease.

**Figure S4.**

Directed acyclic graph depicting unmeasured variables (gray nodes) that are potential sources of residual confounding bias in model 3. Green node with “►” illustrates exposures. Blue node with “I” illustrates

outcomes. White nodes illustrate covariates that have been conditioned on. Gray nodes indicate unobserved variables. Red arcs depict biasing pathways, black arcs depict blocked pathways, green arcs indicate causal pathways. BMI: Body mass index, CHD: Coronary heart disease. Note that when Atrial fibrillation is applied as an exposure, anticoagulant treatment becomes an ancestor of an exposure and an outcome, and as such is also a potential source of residual confounding bias.

**Table S3.**

Risk ratio with 95% confidence interval for atrial fibrillation after inclusion of hospital registry confirmed diagnoses in non-athletes who did not attend follow-up.

| Exposure     | n    | Number of cases n (%) | Model 1            | Model 2            | Model 3            |
|--------------|------|-----------------------|--------------------|--------------------|--------------------|
| Non-athletes | 1864 | 480 (25.8)            | 1 Reference        | 1 Reference        | 1 Reference        |
| Athletes     | 505  | 145 (28.7)            | 1.24 (1.06 – 1.46) | 1.15 (0.96 – 1.37) | 1.52 (1.24 – 1.88) |

Model 1: Adjusted for age. Model 2: Adjusted model 1 + body height, education, smoking and frequency of alcohol intake. Model 3: Adjusted for model 2 + coronary heart disease, diabetes, body mass index, and antihypertensive medication.

**Table S4.**

Risk ratio with 95% confidence interval for atrial fibrillation after exclusion of participants reporting overweight, use of antihypertensives, smoking, coronary heart disease and diabetes.

| Exposure     | n   | Number of cases n (%) | Risk ratio (95% CI) |
|--------------|-----|-----------------------|---------------------|
| Non-athletes | 256 | 33 (12.9)             | 1 Reference         |
| Athletes     | 328 | 82 (25.0)             | 1.63 (1.06 – 2.51)  |

CI: Confidence interval. Adjusted for age, body height, education, previous smoker, and frequency of alcohol intake.

**Table S5.**

Risk ratio with 95% confidence intervals for atrial fibrillation and stroke in participants aged  $\leq 75$  years.

| Exposure                   | n    | Number of cases n (%) | Model 1            | Model 2            | Model 3            |
|----------------------------|------|-----------------------|--------------------|--------------------|--------------------|
| <b>Atrial fibrillation</b> |      |                       |                    |                    |                    |
| Non-athletes               | 1387 | 238 (17.2)            | 1 Reference        | 1 Reference        | 1 Reference        |
| Athletes                   | 469  | 137 (29.2)            | 1.72 (1.43 – 2.06) | 1.47 (1.20 – 1.80) | 1.98 (1.54 – 2.55) |
| <b>Stroke</b>              |      |                       |                    |                    |                    |
| Non-Athletes               | 1041 | 91 (8.7)              | 1 Reference        | 1 Reference        | 1 Reference        |
| Athletes                   | 443  | 21 (4.7)              | 0.55 (0.35 – 0.87) | 0.62 (0.38 – 1.02) | 0.73 (0.43 – 1.23) |

Model 1: Adjusted for age, Model 2: Additionally adjusted for body height, education, smoking status and frequency of alcohol intake, Model 3: Adjusted for model 2 + coronary heart disease (AF only), diabetes (AF only), body mass index, and antihypertensive medication. For analysis of stroke participants, those reporting coronary heart disease and diabetes at baseline have been excluded.

**Table S6.**

Risk ratio with 95% confidence interval for stroke with coronary heart disease and diabetes participants included.

| Exposure     | n    | Number of cases n (%) | Model 1            | Model 2            | Model 3            |
|--------------|------|-----------------------|--------------------|--------------------|--------------------|
| Non-athletes | 1829 | 183 (10.0)            | 1 Reference        | 1 Reference        | 1 Reference        |
| Athletes     | 498  | 28 (5.6)              | 0.60 (0.41 – 0.89) | 0.69 (0.45 – 1.04) | 0.83 (0.53 – 1.30) |

Model 1: Age adjusted, Model 2: Additionally adjusted for body height, education, smoking status and frequency of alcohol intake, Model 3: Adjusted for model 2 + coronary heart disease, diabetes, body mass index, and antihypertensive medication.
