# Supplementary figures and images for: Risk of atrial fibrillation and stroke among older men exposed to prolonged endurance sport practice: a 10-year follow-up. The Birkebeiner Ageing Study and the Tromsø Study
Source: PubMed Central journal article supplement — Open Heart. 2022 Nov 17;9(2):e002154. doi: 10.1136/openhrt-2022-002154 (PMC9677011; doi:10.1136/openhrt-2022-002154), 2022-11-17

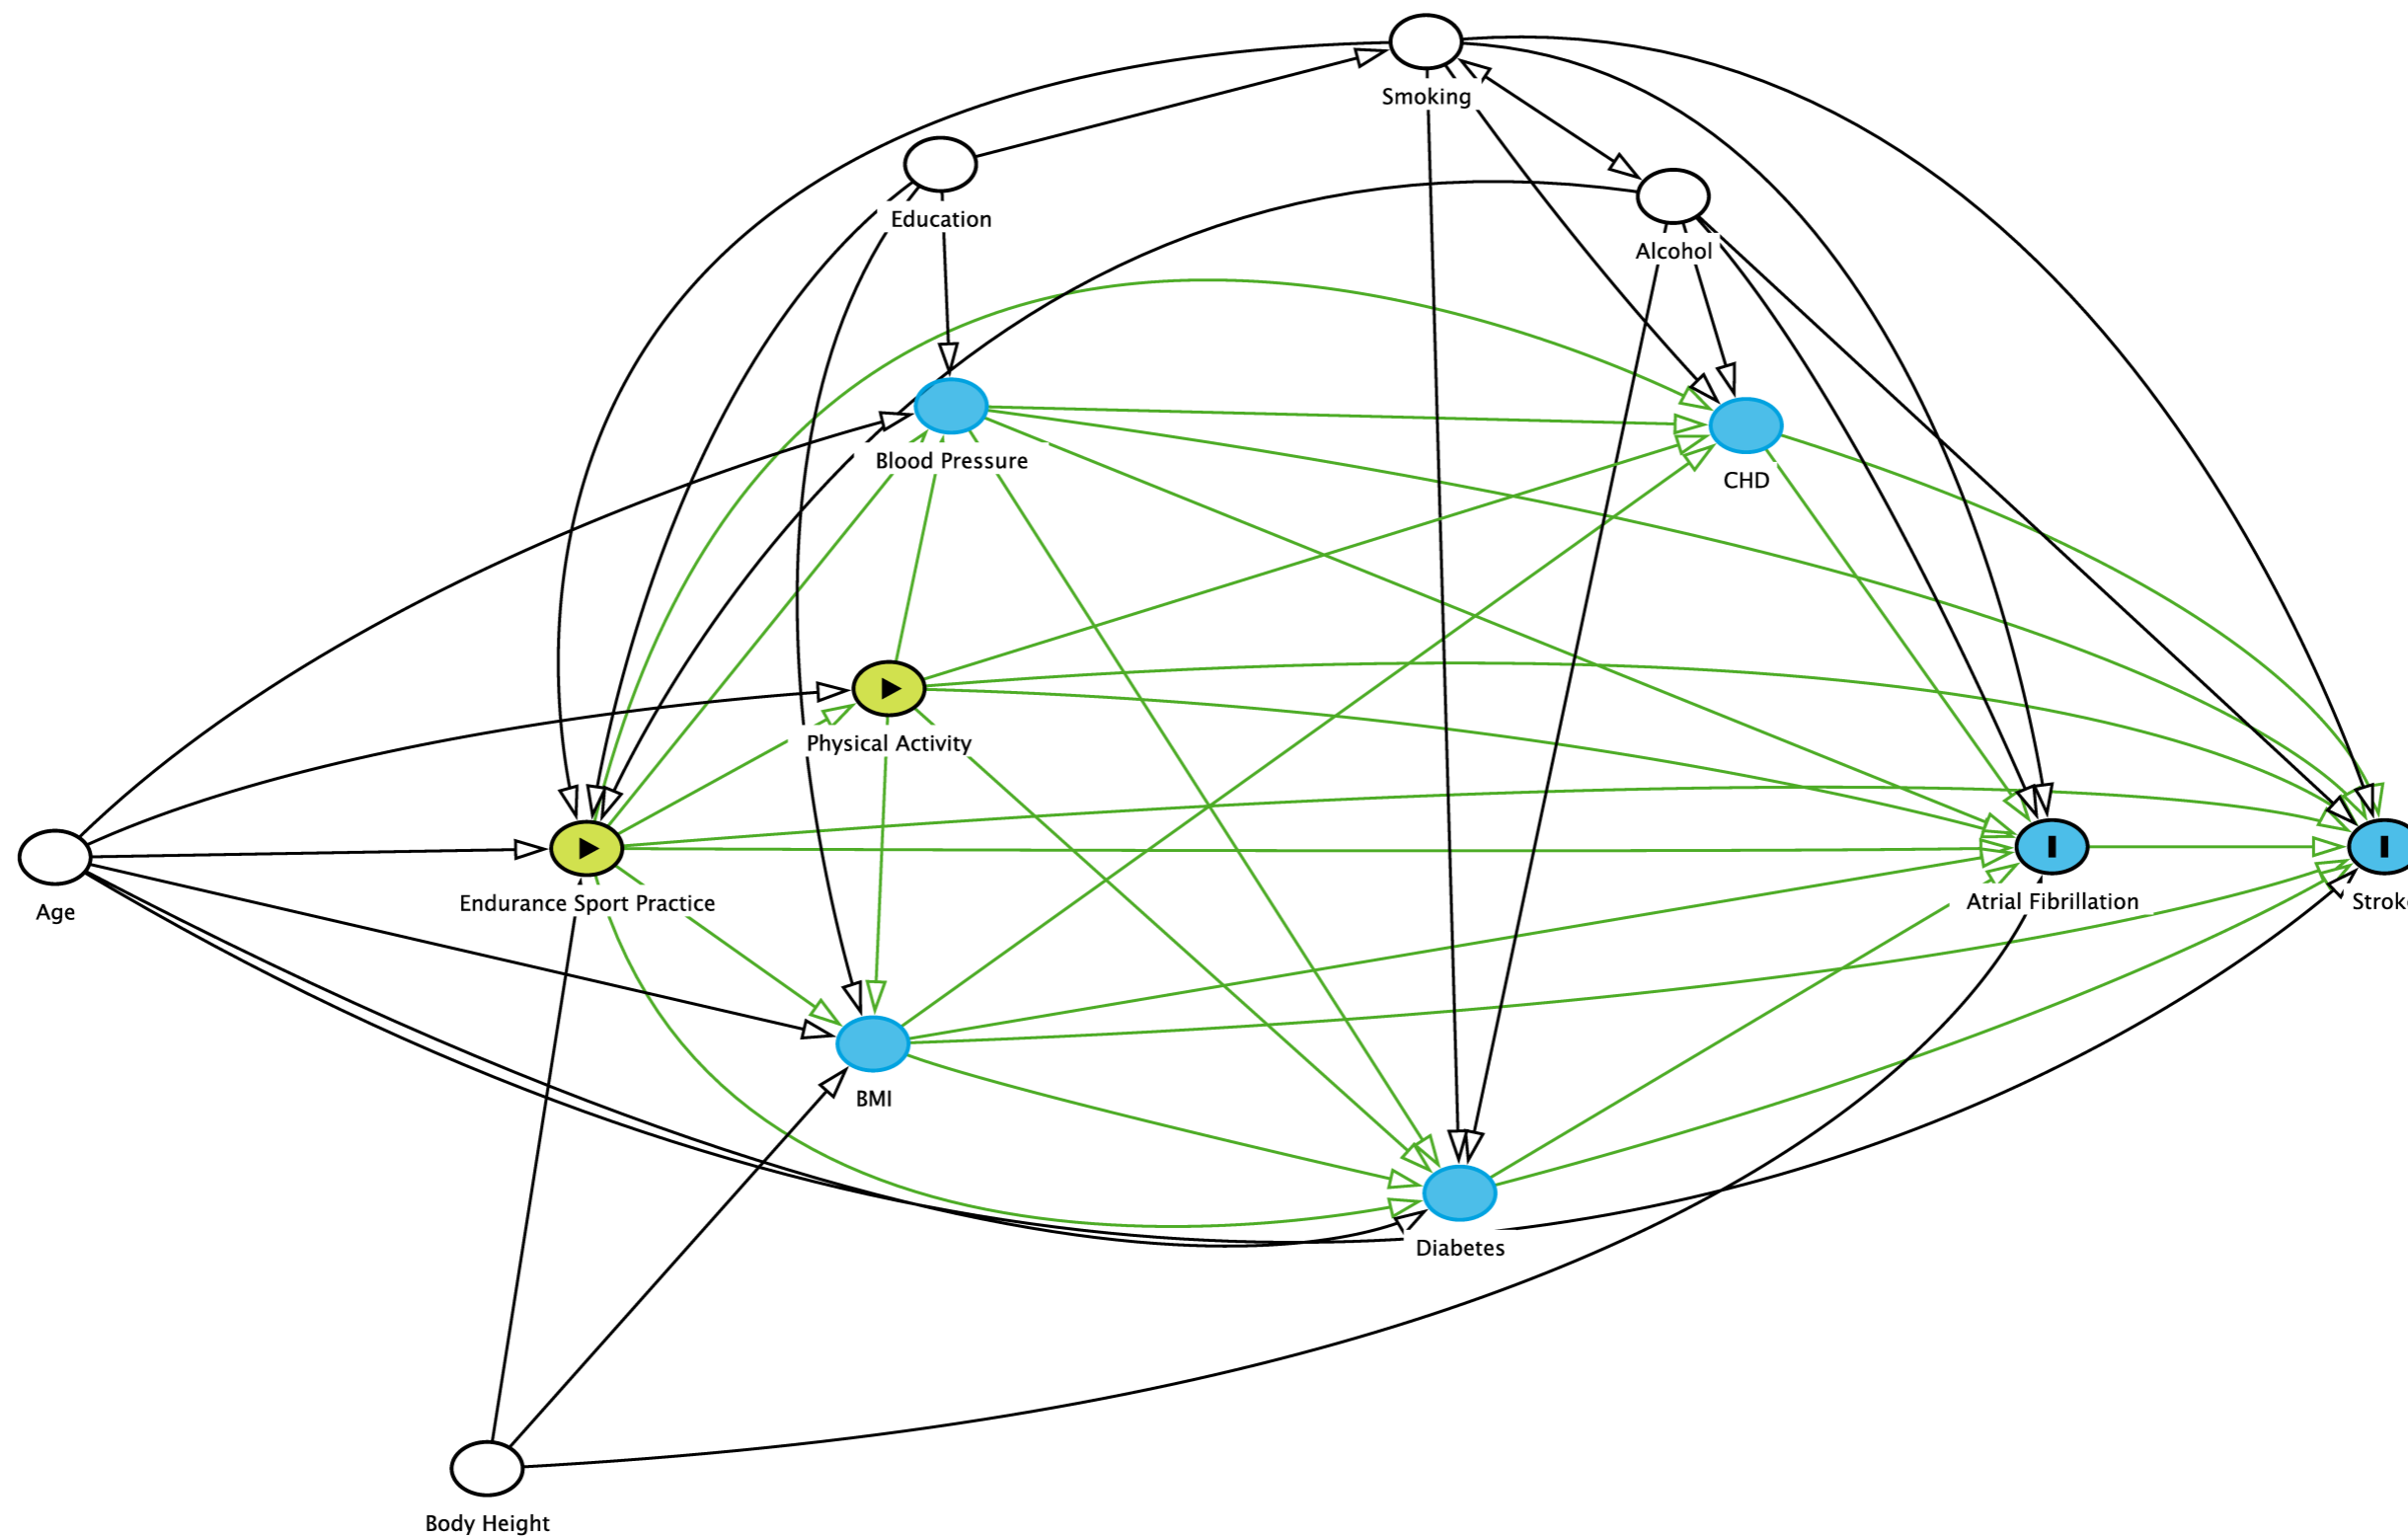

Supplement: openhrt-2022-002154supp002.pdf [file openhrt-2022-002154supp002.pdf]

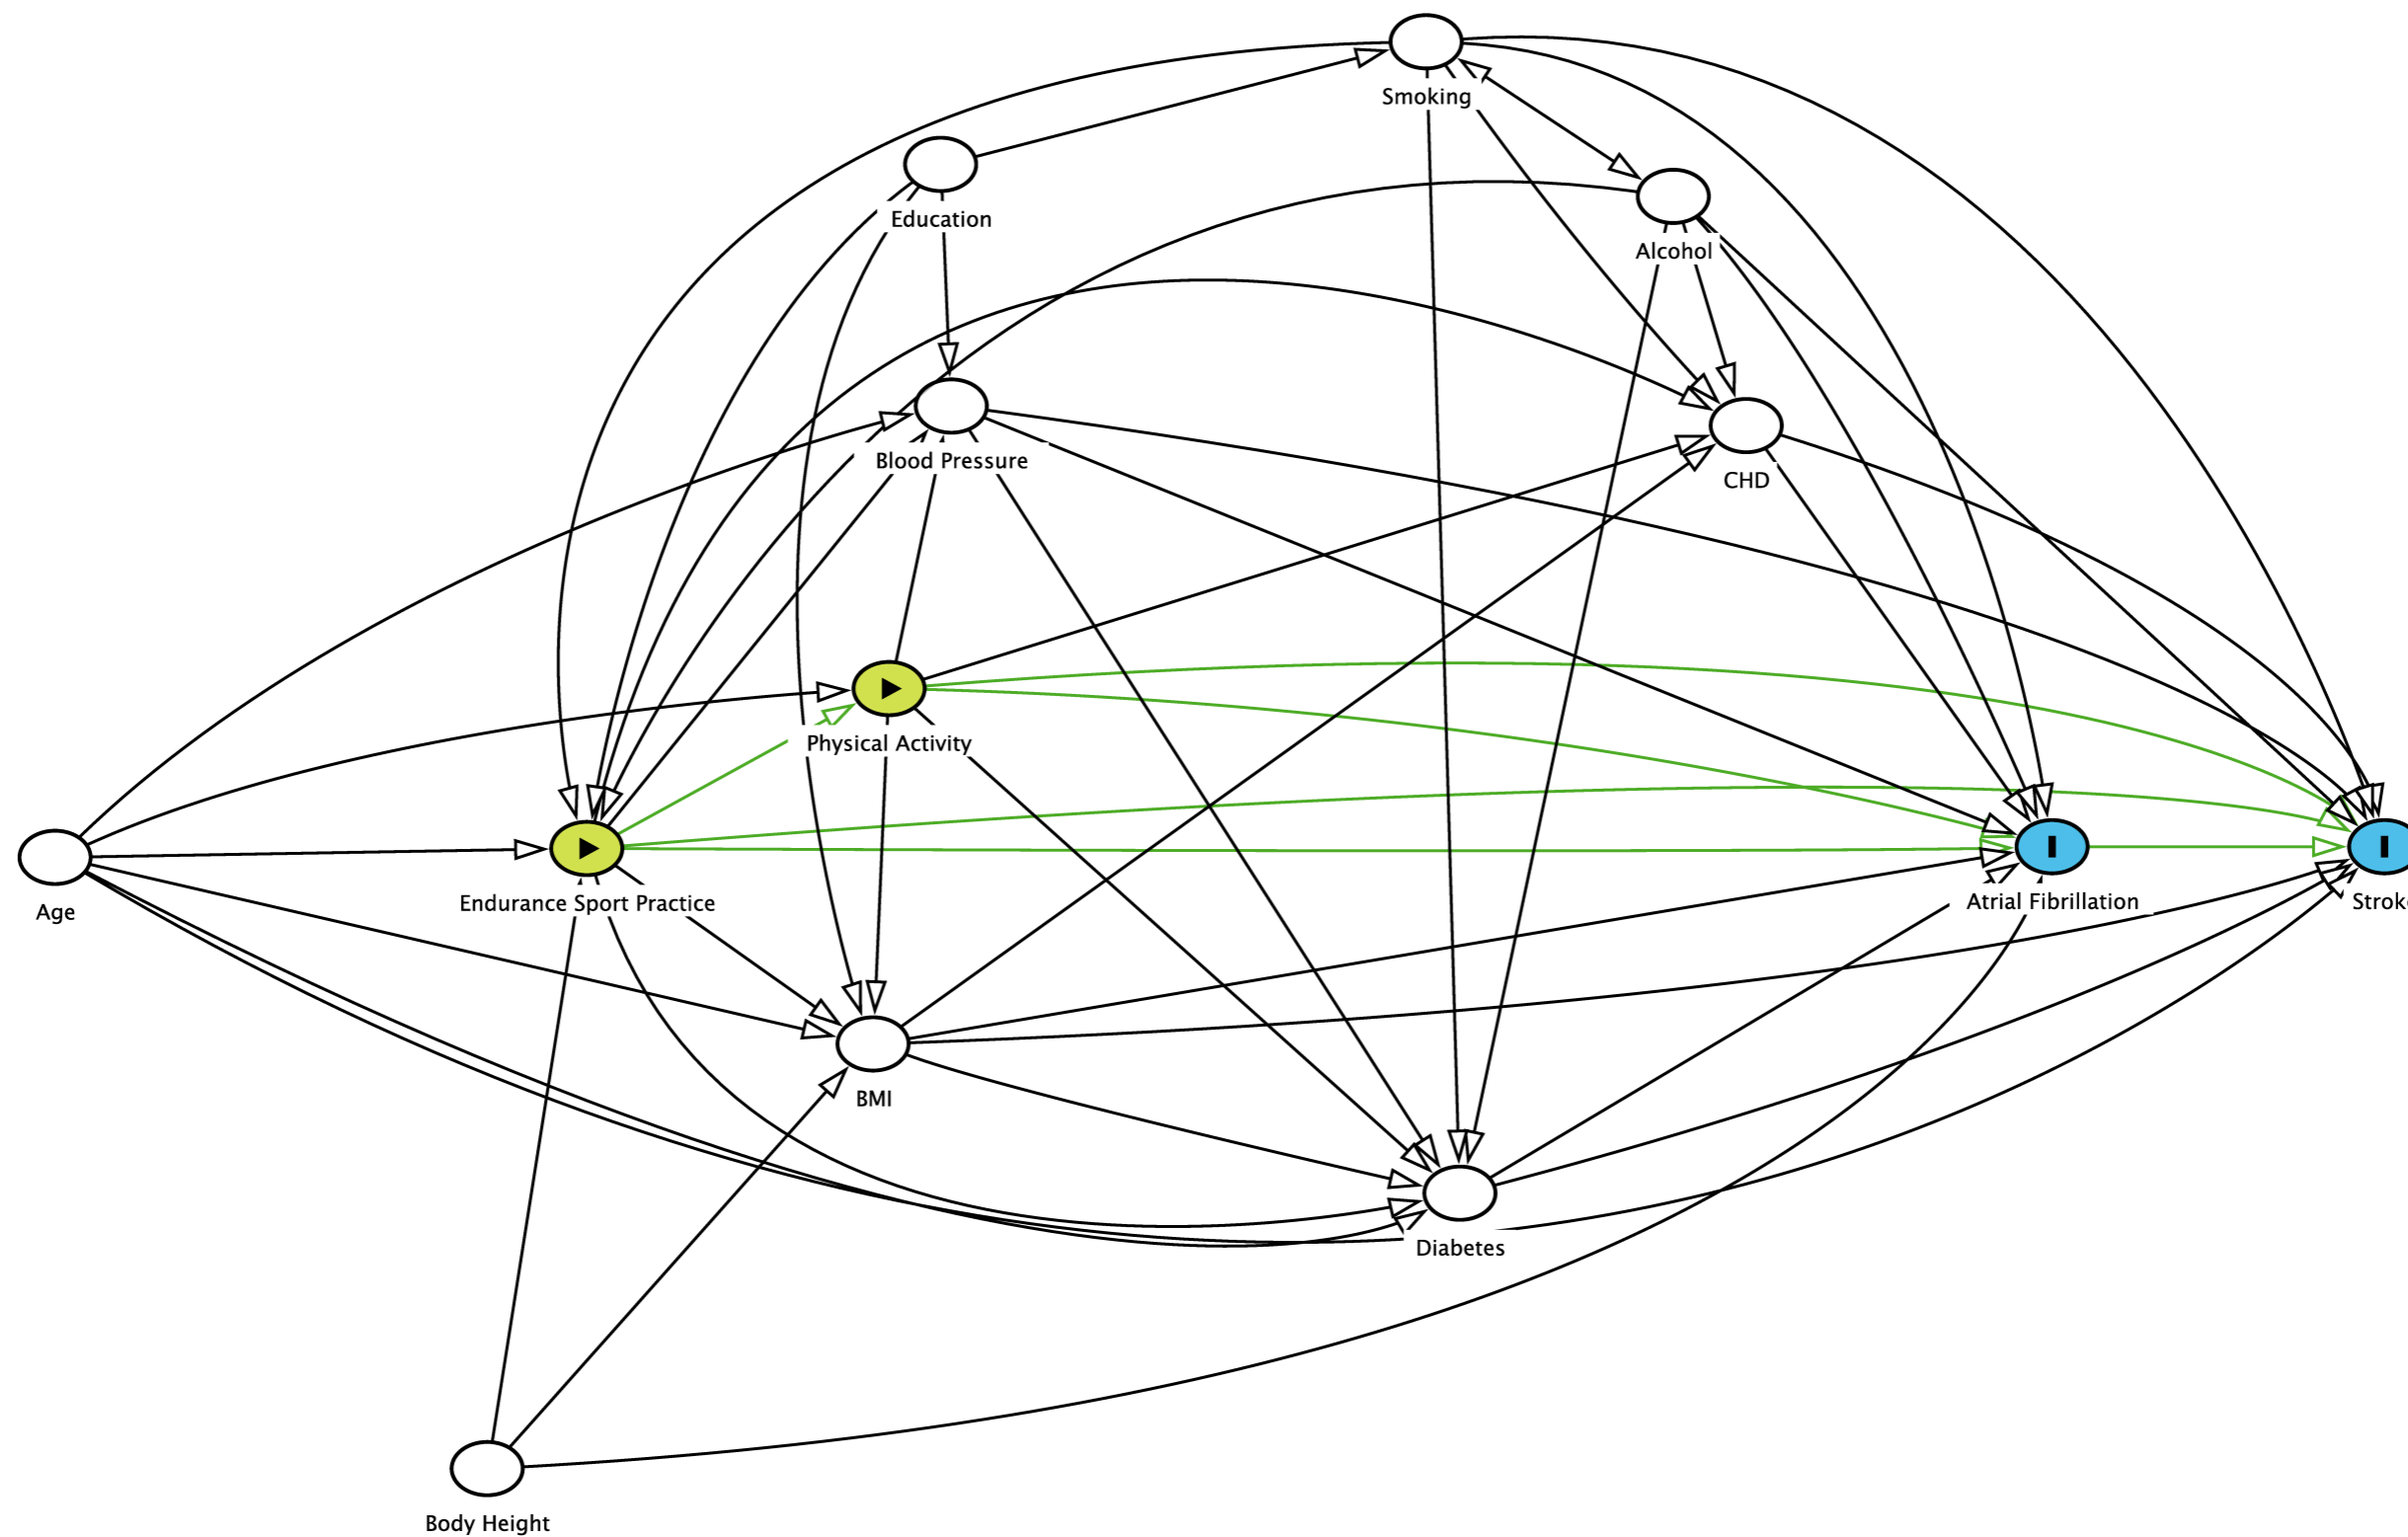

Supplement: openhrt-2022-002154supp003.pdf [file openhrt-2022-002154supp003.pdf]

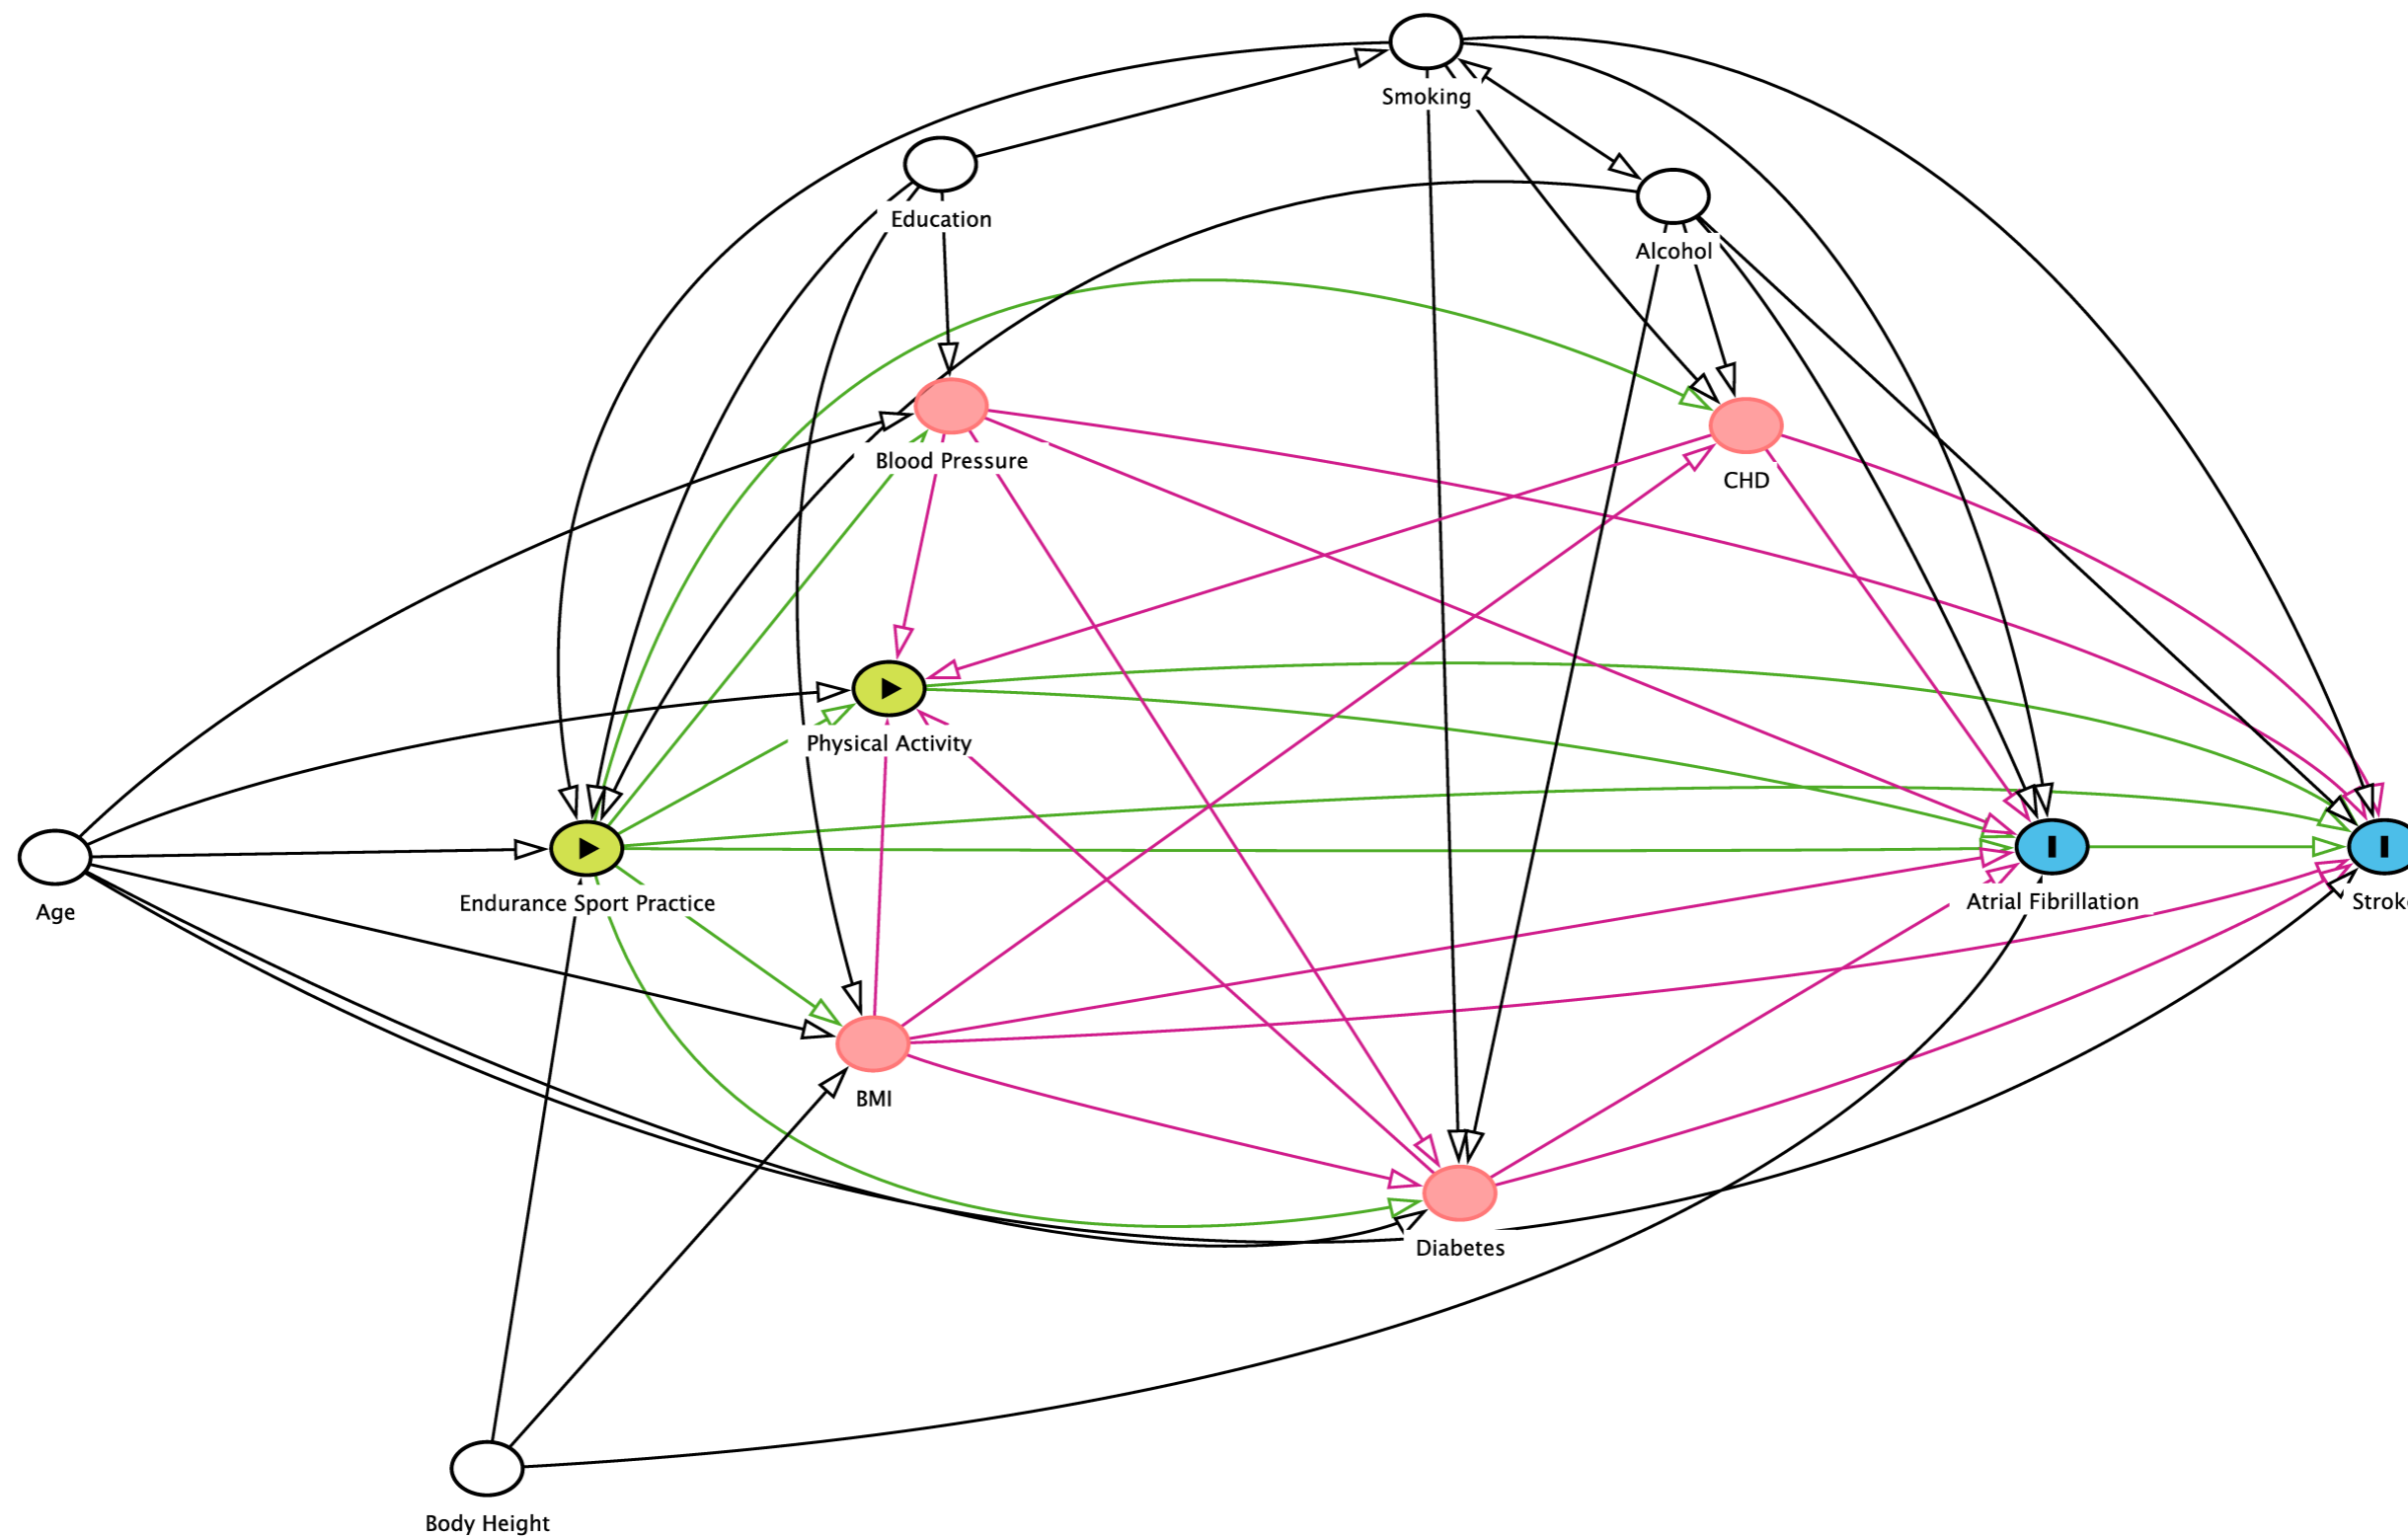

Supplement: openhrt-2022-002154supp004.pdf [file openhrt-2022-002154supp004.pdf]

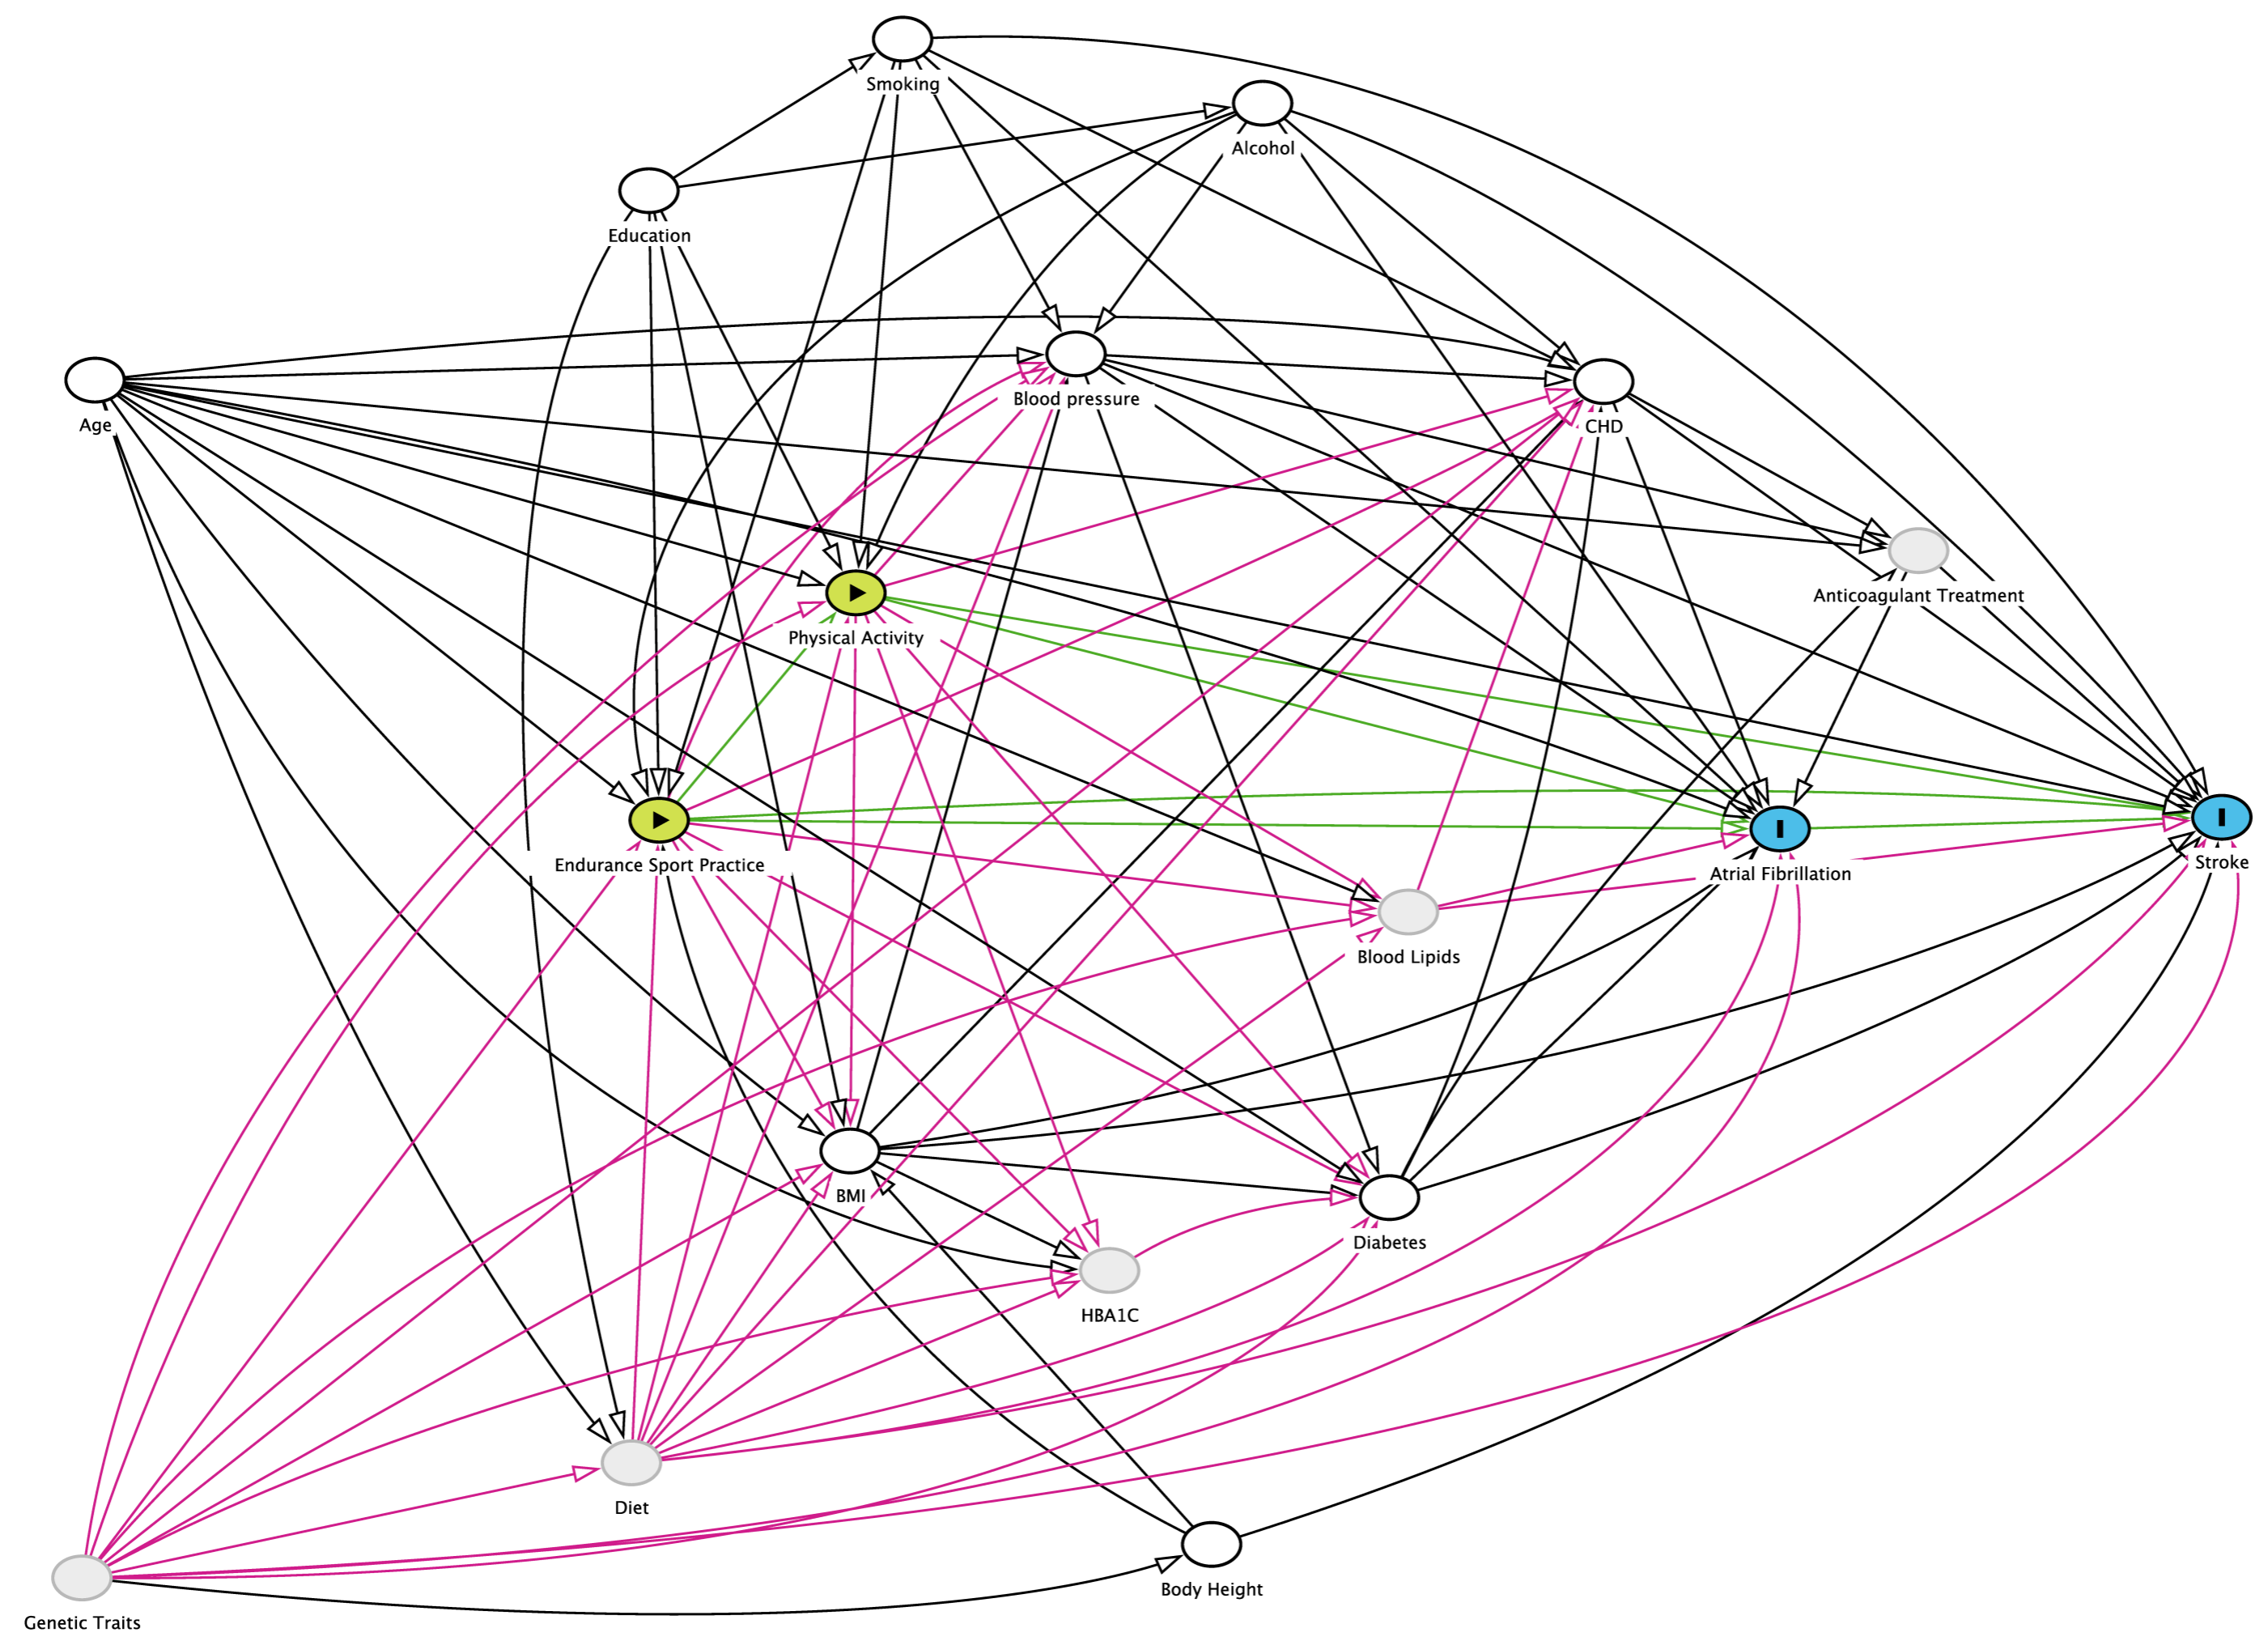

Supplement: openhrt-2022-002154supp005.pdf [file openhrt-2022-002154supp005.pdf]
